# Supplementary material for: Ocean Acidification trends and Carbonate System dynamics in the North Atlantic Subpolar Gyre during 2009–2019
Source: Copernicus journal article supplement (doi:10.5194/egusphere-2024-1388), 2024-06-11
Supplement: Supplementary file 1 [file egusphere-2024-1388-supplement.pdf]

Supplementary

## **Ocean Acidification trends and Carbonate System dynamics in the North Atlantic Subpolar Gyre during 2009-2019**

Curbelo-Hernández, D.<sup>1</sup>, Pérez, F.F.<sup>2</sup>, González-Dávila, M.<sup>1,\*</sup>, Gladyshev, S.<sup>3</sup>, González, A. G.<sup>1</sup>, González-Santana, D.<sup>1</sup>, Velo, A.<sup>2</sup>, Sokov, A.<sup>3</sup>, and Santana-Casiano, J. M.<sup>1</sup>.

<sup>1</sup> Instituto de Oceanografía y Cambio Global (IOCAG), Universidad de Las Palmas de Gran Canaria (ULPGC). Las Palmas de Gran Canaria, Spain.

<sup>2</sup> Instituto de Investigaciones Marinas (IIM), CSIC, Vigo, Spain.

<sup>3</sup> P. P. Shirshov Institute of Oceanology, Russian Academy of Sciences, Moscow, Russian Federation

\*Corresponding Author: Melchor González-Dávila ([melchor.gonzalez@ulpgc.es](mailto:melchor.gonzalez@ulpgc.es))

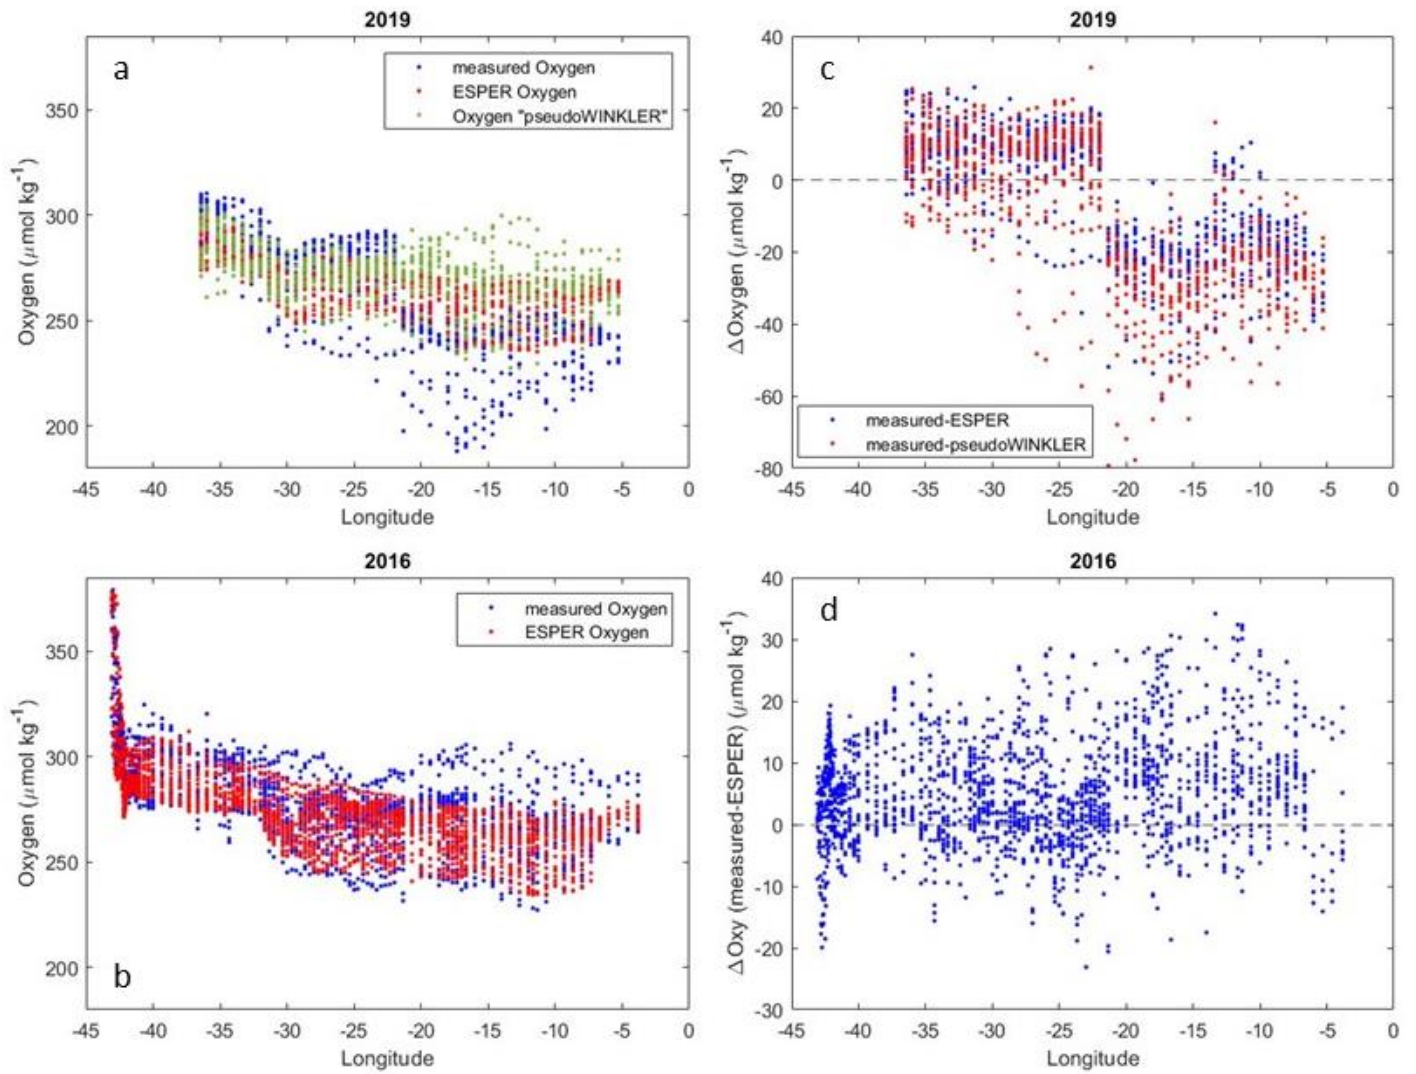

Figure S1. Longitudinal distribution of (a) sensor-measured, ESPER-estimated and pseudo-WIKLER oxygen data for 2019, (b) WINKLER-measured and ESPER-estimated data for 2016, (c)  $\Delta\text{DO}_{\text{meas-ESPER}}$  and  $\Delta\text{DO}_{\text{meas-pseudoWINKLER}}$  for the cruise of 2019 and (d)  $\Delta\text{DO}_{\text{meas-ESPER}}$  for the cruise of 2016.

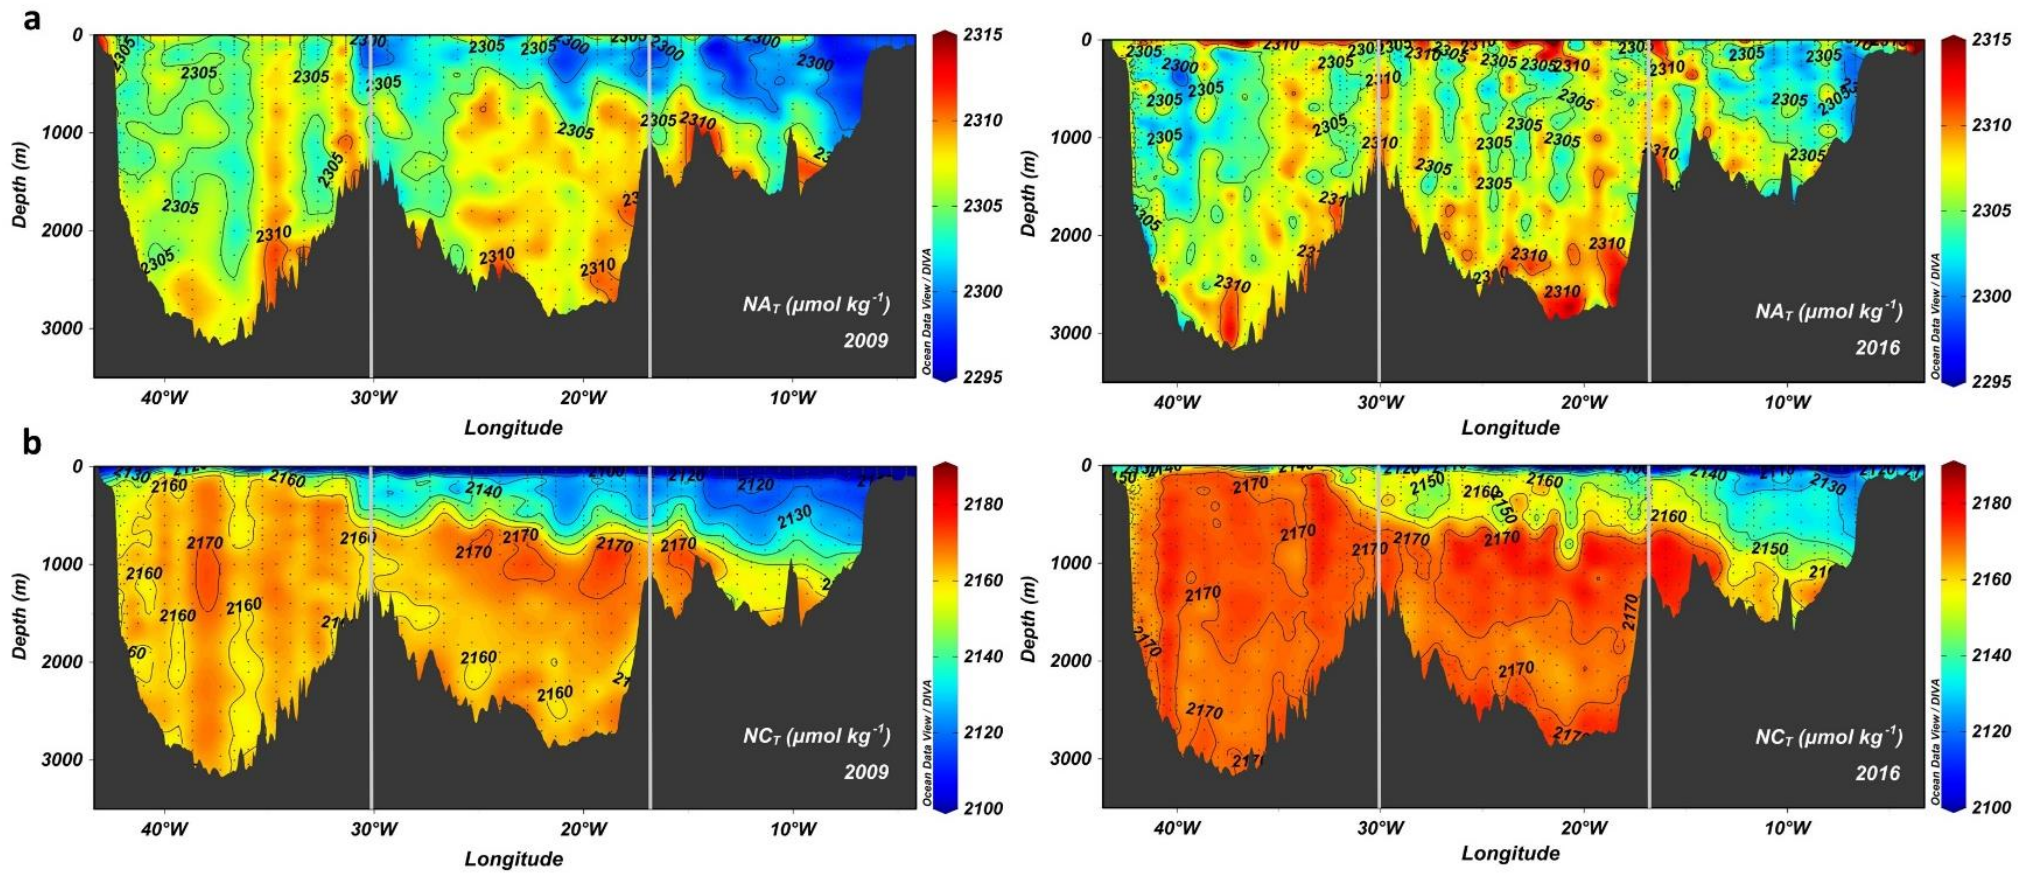

Figure S2. Water-column distribution along the longitudinal transect of (a)  $NA_T$  and (b)  $NC_T$  for the cruises of 2009 (left plots) and 2016 (right plots). The vertical white lines show the limits between basins.

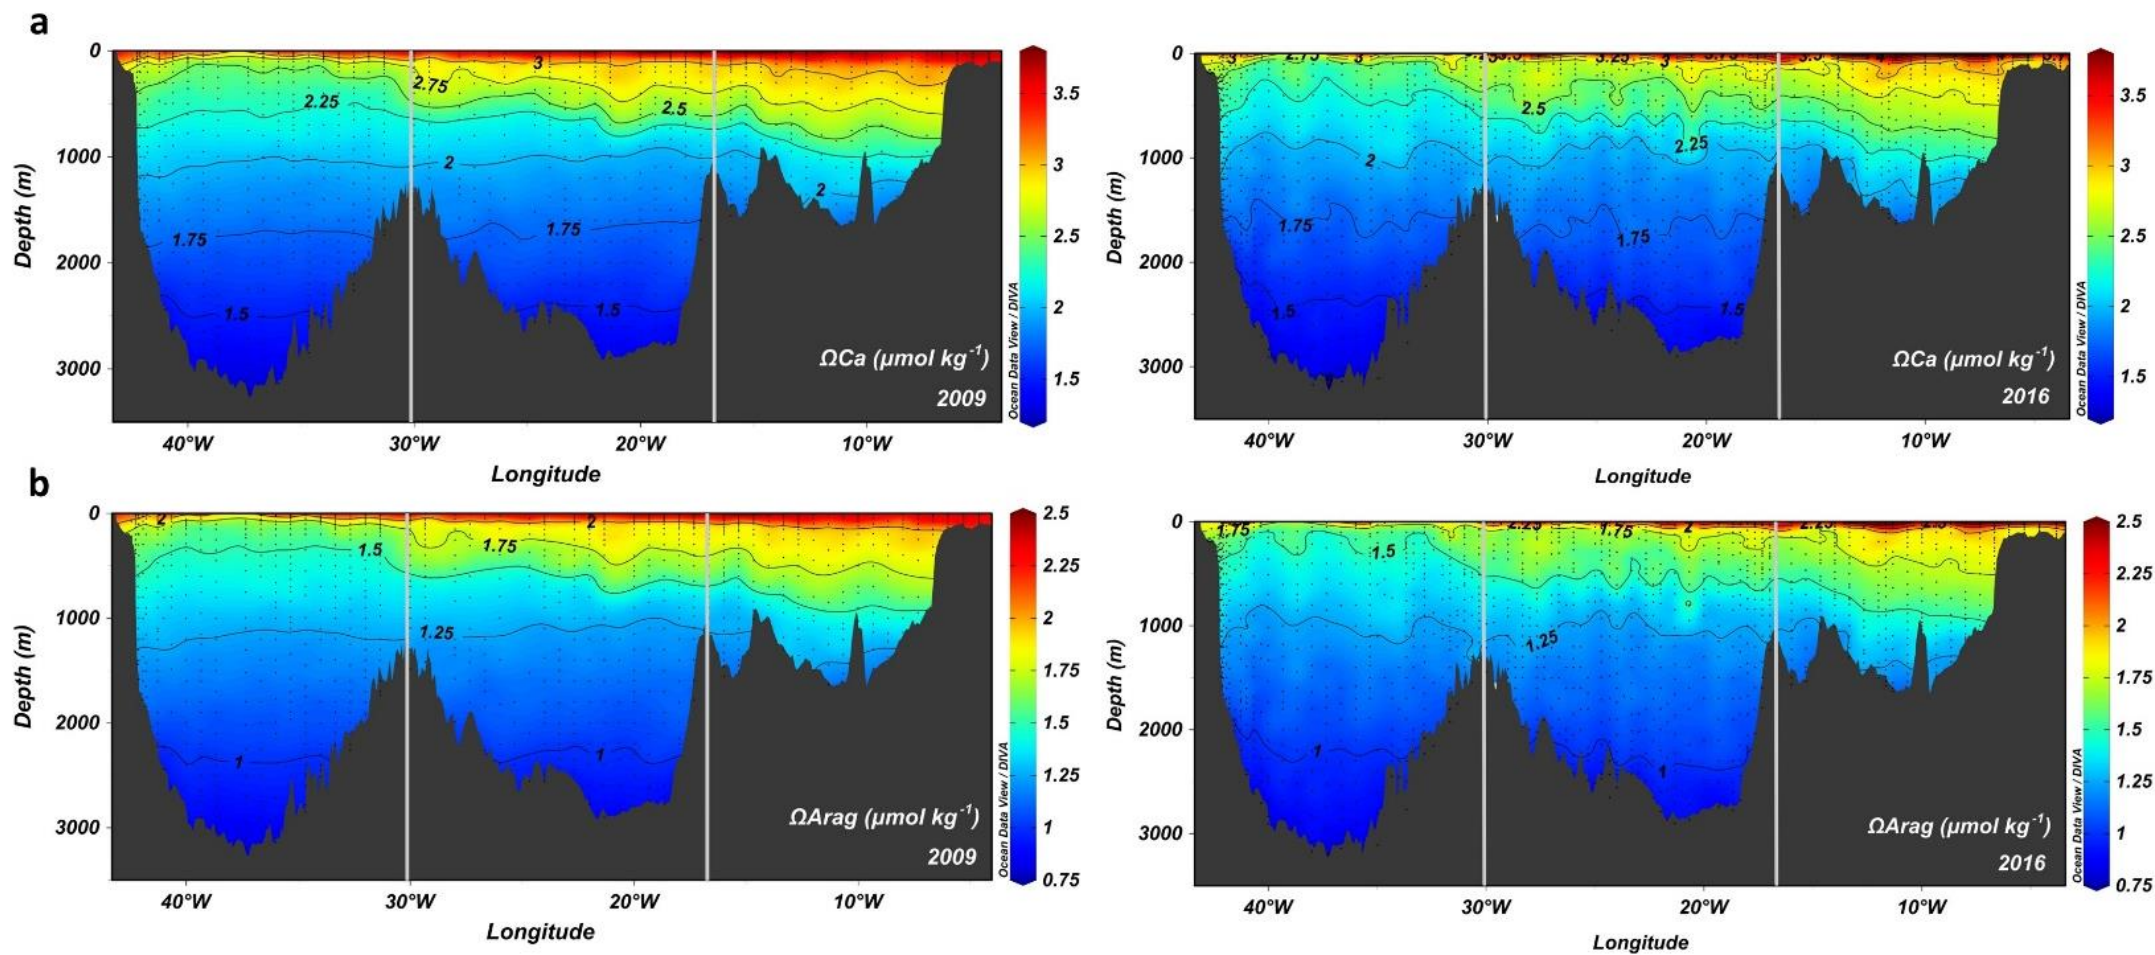

Figure S3. Same as Figure S2 but for (a)  $\Omega\text{Ca}$  and (b)  $\Omega\text{Arag}$ .

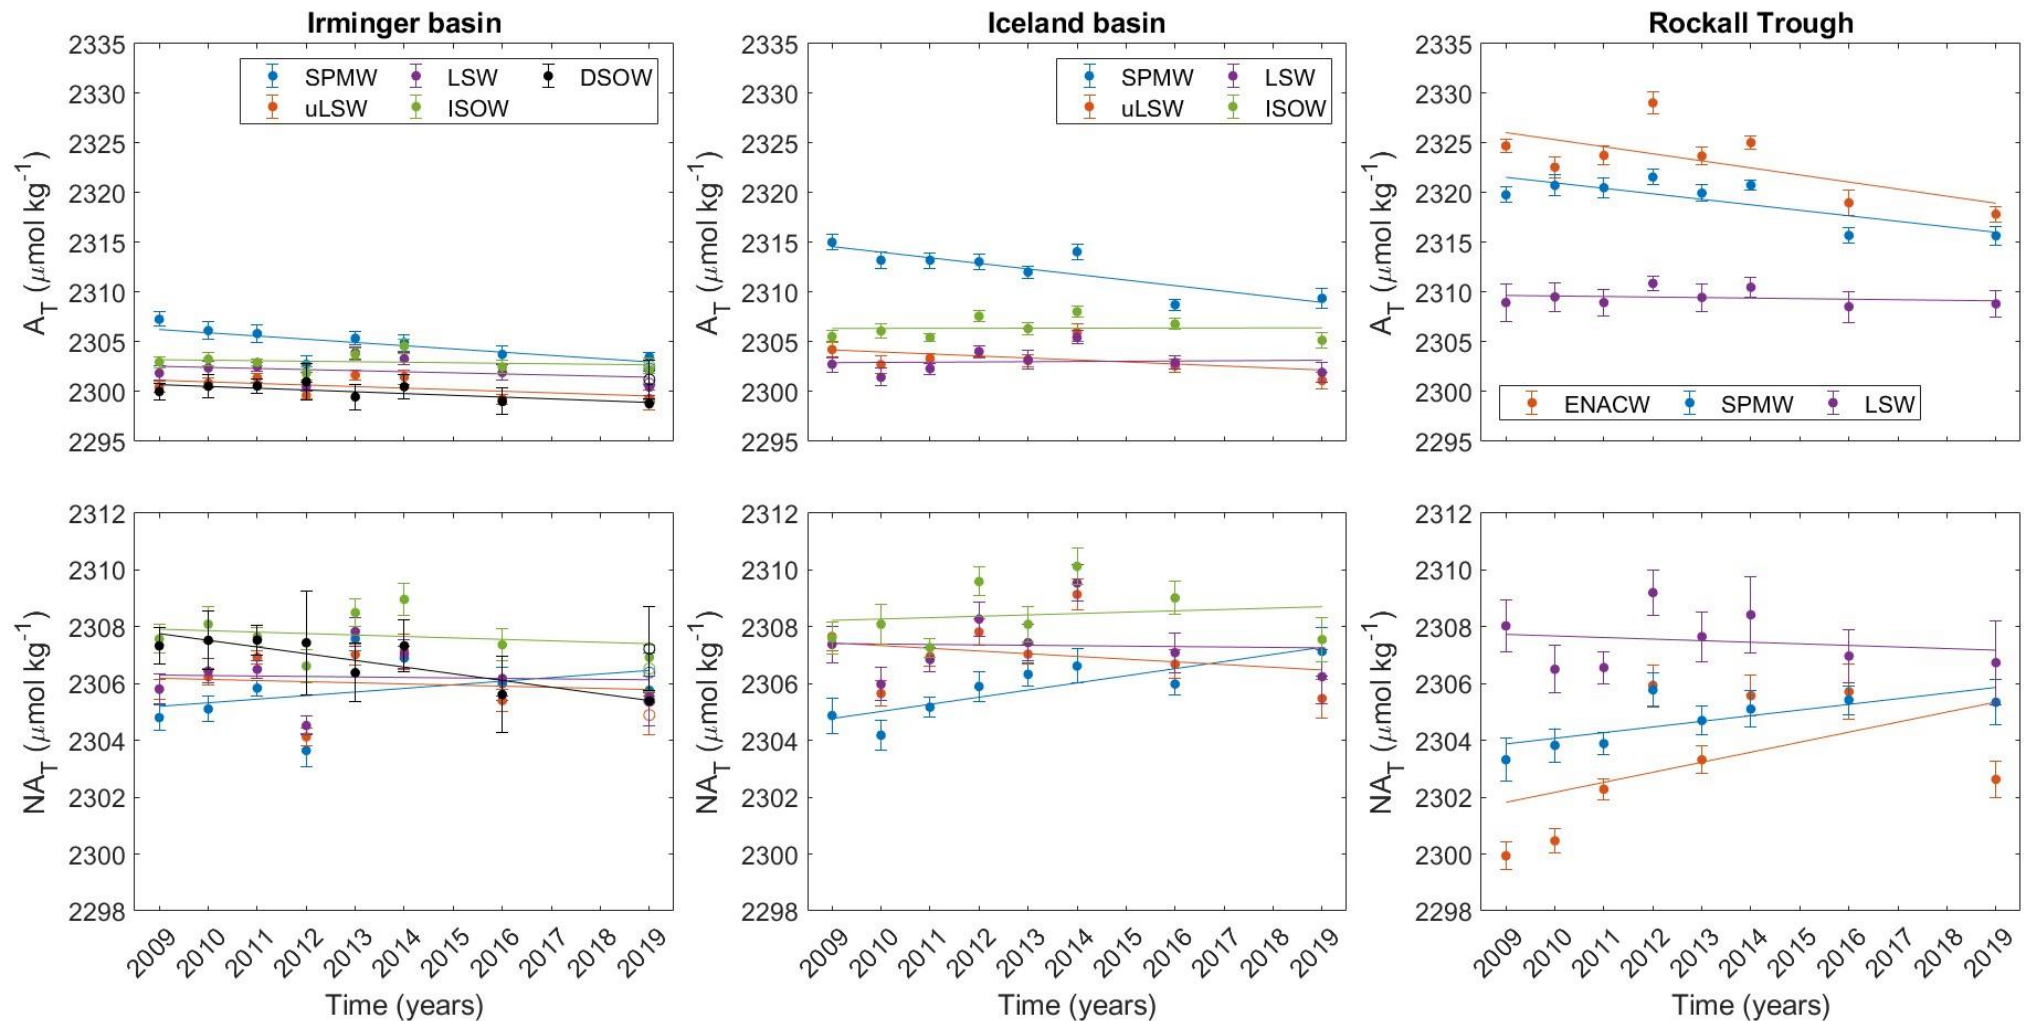

Figure S4. Temporal distribution (2009-2019) of the average  $A_T$  and  $NA_T$  in each of the layers considered for the Irminger (left plot column), Iceland (central plot column) and Rockall basins (right plot column). The average values were calculated for each cruise and layer and represented with coloured points together with their respective error bars at the time of each cruise (the method used for calculations was described in section 3.2). In the Irminger plots, the empty points represent the average values for 2019 calculated with the measured data available in the easternmost part of the basin (sampled part during this cruise), while the coloured points for 2019 represent the average values corrected with A25-OVIDE-2018 data. The interannual trend were given by linear regression of the average values, with the values of the slope, the standard error of estimate and the  $r^2$  presented in Table S4.

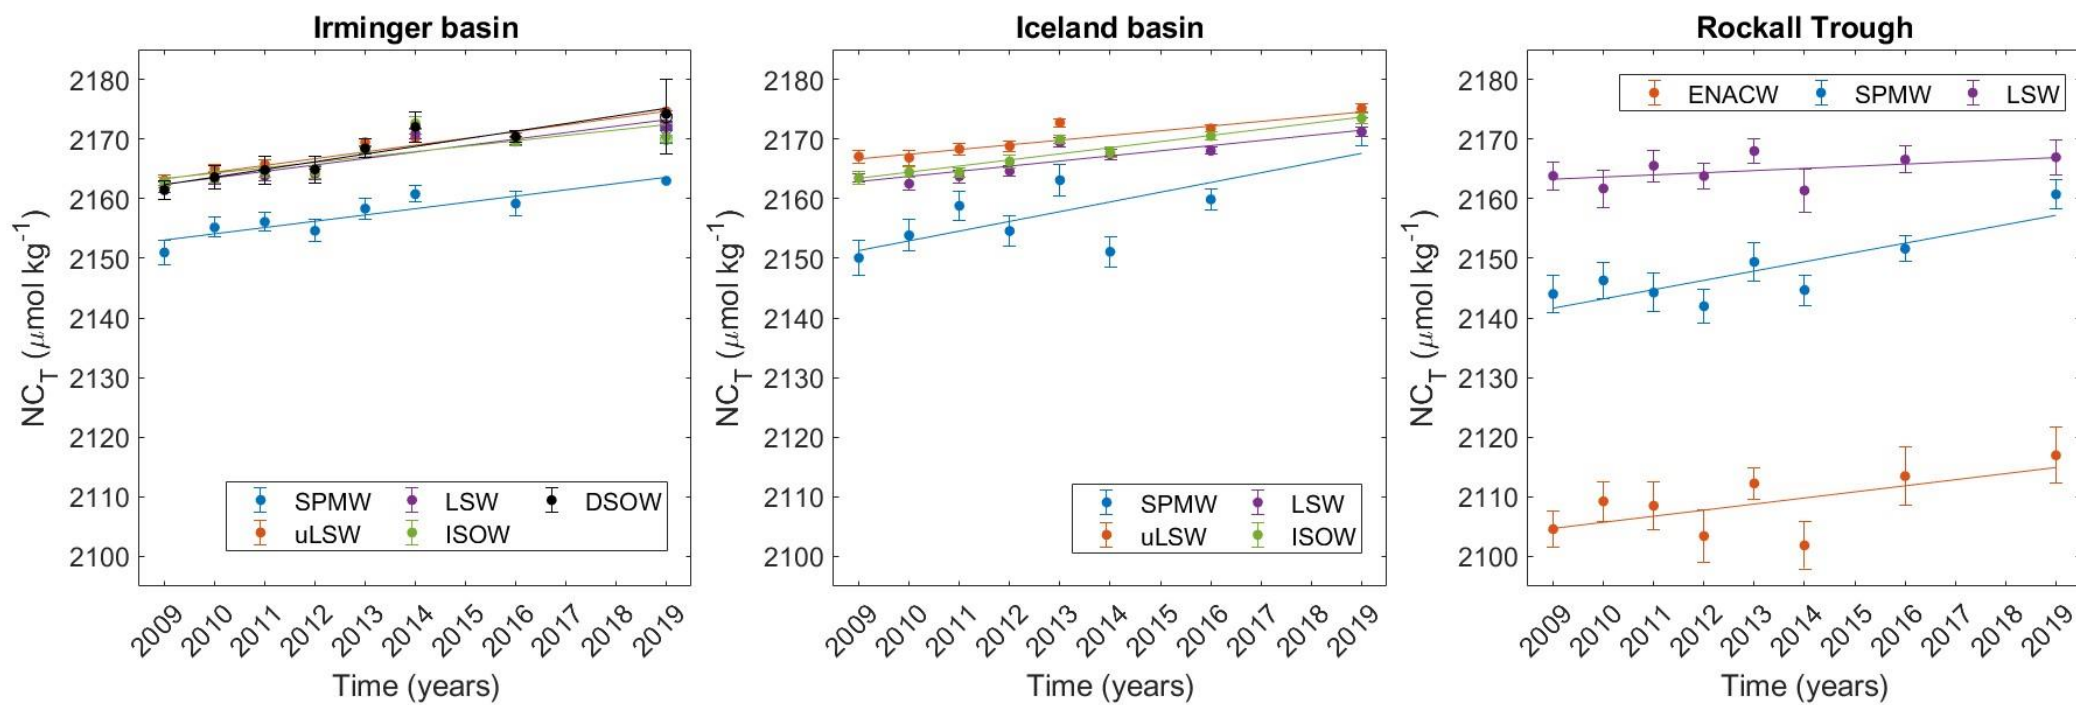

Figure S5. Same as Figure S4 but for  $NC_T$ .

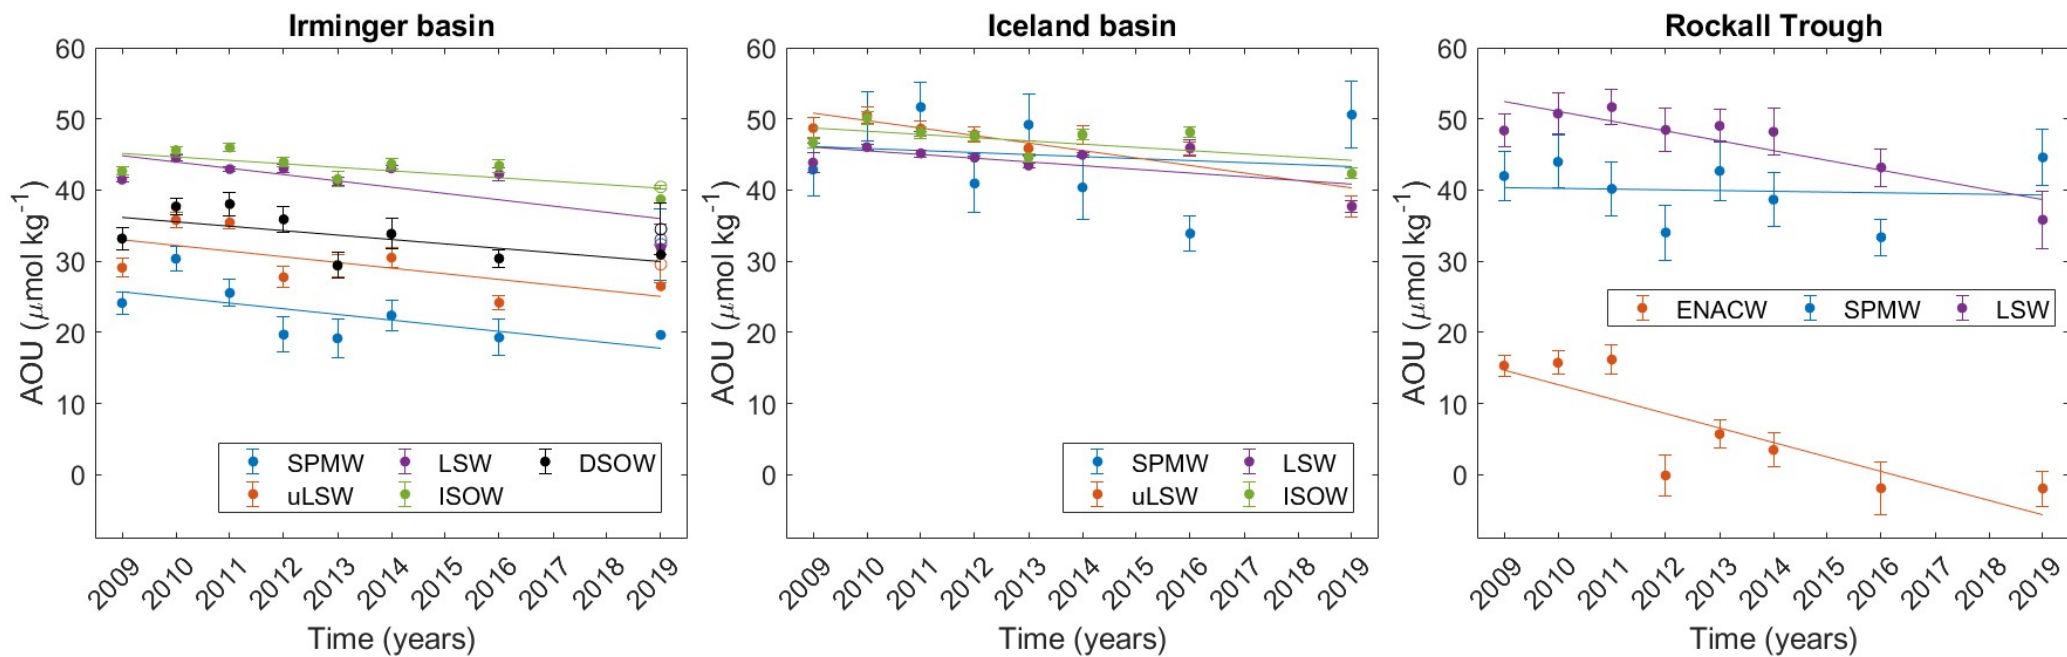

Figure S6. Same as Figure S4 but for AOU.

Table S1. Amount of data (n), mean values and standard deviation (std) per cruise for the measured temperature, salinity, A<sub>T</sub>, C<sub>T</sub>, pH<sub>T</sub>, DO, PO<sub>4</sub> and Si(OH)<sub>4</sub>.

| Cruise | Temperature (°C) |       |       | Salinity |        |       | A <sub>T</sub> (μmol kg <sup>-1</sup> ) |        |      | C <sub>T</sub> (μmol kg <sup>-1</sup> ) |        |      | pH <sub>T</sub> |        |        | DO (μmol kg <sup>-1</sup> ) |       |      | PO <sub>4</sub> (μmol kg <sup>-1</sup> ) |      |      | Si(OH) <sub>4</sub> (μmol kg <sup>-1</sup> ) |      |      |
|--------|------------------|-------|-------|----------|--------|-------|-----------------------------------------|--------|------|-----------------------------------------|--------|------|-----------------|--------|--------|-----------------------------|-------|------|------------------------------------------|------|------|----------------------------------------------|------|------|
|        | n                | mean  | std   | n        | mean   | std   | n                                       | mean   | std  | n                                       | mean   | std  | n               | mean   | std    | n                           | mean  | std  | n                                        | mean | std  | n                                            | mean | std  |
| 2009   | 1307             | 6.509 | 2.966 | 1307     | 35.094 | 0.177 | 1087                                    | 2308.5 | 12.8 | 559                                     | 2149.3 | 20.2 | 975             | 8.0066 | 0.0387 | 1297                        | 266.8 | 16.7 | 1319                                     | 0.96 | 0.22 | 1326                                         | 8.83 | 3.44 |
| 2010   | 1192             | 6.711 | 3.233 | 1192     | 35.089 | 0.173 | 870                                     | 2309.7 | 9.0  | 763                                     | 2151.8 | 23.5 | 1071            | 7.9978 | 0.0365 | 1178                        | 261.3 | 15.7 | 1220                                     | 0.88 | 0.27 | 1228                                         | 8.42 | 3.96 |
| 2011   | 1279             | 5.979 | 2.770 | 1279     | 35.055 | 0.156 | 1080                                    | 2308.4 | 9.5  | 851                                     | 2154.1 | 21.1 | 1035            | 7.9994 | 0.0350 | 1167                        | 266.2 | 15.4 | 1284                                     | 0.92 | 0.23 | 1284                                         | 8.67 | 3.72 |
| 2012   | 1205             | 5.867 | 2.541 | 1205     | 35.056 | 0.159 | 1189                                    | 2308.3 | 12.5 | 900                                     | 2152.9 | 20.8 | 1126            | 8.0105 | 0.0438 | 1136                        | 272.9 | 17.6 | 1163                                     | 0.91 | 0.21 | 1158                                         | 8.22 | 3.49 |
| 2013   | 1235             | 6.354 | 2.592 | 1235     | 35.057 | 0.158 | 1324                                    | 2306.8 | 15.3 | 1206                                    | 2154.4 | 19.4 | 1199            | 8.0077 | 0.0394 | 1223                        | 272.3 | 19.0 | 1248                                     | 0.90 | 0.21 | 1279                                         | 7.56 | 3.73 |
| 2014   | 1226             | 6.476 | 2.889 | 1226     | 35.068 | 0.157 | 1059                                    | 2307.7 | 16.1 | 983                                     | 2151.0 | 25.5 | 1196            | 8.0089 | 0.0454 | 1211                        | 271.3 | 16.5 | 1272                                     | 0.90 | 0.27 | 1275                                         | 6.82 | 3.67 |
| 2016   | 1849             | 5.514 | 2.253 | 1849     | 35.001 | 0.114 | 1557                                    | 2305.6 | 8.2  | 1465                                    | 2157.9 | 19.0 | 1349            | 7.9959 | 0.0415 | 1676                        | 276.1 | 16.5 | 1608                                     | 0.96 | 0.23 | 1642                                         | 7.49 | 2.97 |
| 2019   | 768              | 6.721 | 3.146 | 768      | 35.042 | 0.126 | 808                                     | 2307.3 | 8.6  | 768                                     | 2155.3 | 28.6 | 755             | 7.9796 | 0.0480 | 768                         | 271.4 | 16.2 |                                          |      |      |                                              |      |      |





Table S3. Amount (n) and percentage of measured and computed  $C_T$  data per cruise used to compile the  $C_T$  "new". No computed  $C_T$  data were used for the 2019 cruise due to lack of measured pH needed for computation.

| Cruise | $C_T$ "new" |                |            |                |            |
|--------|-------------|----------------|------------|----------------|------------|
|        | n total     | $C_T$ measured |            | $C_T$ computed |            |
|        |             | n              | percentage | n              | percentage |
| 2009   | 1088        | 501            | 46.05%     | 587            | 53.95%     |
| 2010   | 1202        | 709            | 58.98%     | 493            | 41.02%     |
| 2011   | 1029        | 645            | 62.68%     | 384            | 37.32%     |
| 2012   | 1161        | 735            | 63.31%     | 426            | 36.69%     |
| 2013   | 1307        | 1095           | 83.78%     | 212            | 16.22%     |
| 2014   | 1285        | 713            | 55.49%     | 572            | 44.51%     |
| 2016   | 1421        | 1223           | 86.07%     | 198            | 13.93%     |
| 2019   | 754         | 754            | 100%       | 0              | 0%         |

Table S4. Interannual trends of  $A_T$ ,  $NA_T$ ,  $NC_T$  and AOU in each of the layers and basins. The ratios of change were based on linear regressions applied to the average values (as represented in Supplementary Figures 2-4) and presented together with its Standard error of estimate. The correlation coefficients  $r^2$  and p-values were also provided. Values in bold denotes that trends are statistically significant at the 95% level of confidence.

| Basin    | Layer | $A_T$                                             |       |             | $NA_T$                                            |       |              | $NC_T$                                            |             |         | AOU                                               |             |         |             |      |       |              |       |             |      |       |
|----------|-------|---------------------------------------------------|-------|-------------|---------------------------------------------------|-------|--------------|---------------------------------------------------|-------------|---------|---------------------------------------------------|-------------|---------|-------------|------|-------|--------------|-------|-------------|------|-------|
|          |       | ratio ( $\mu\text{mol kg}^{-1} \text{ yr}^{-1}$ ) | $r^2$ | p-value     | ratio ( $\mu\text{mol kg}^{-1} \text{ yr}^{-1}$ ) | $r^2$ | p-value      | ratio ( $\mu\text{mol kg}^{-1} \text{ yr}^{-1}$ ) | $r^2$       | p-value | ratio ( $\mu\text{mol kg}^{-1} \text{ yr}^{-1}$ ) | $r^2$       | p-value |             |      |       |              |       |             |      |       |
| Irminger | SPMW  | <b>-0.33</b>                                      | $\pm$ | <b>0.17</b> | 0.50                                              | 0.05  | 0.13         | $\pm$                                             | 0.18        | 0.12    | 0.41                                              | <b>1.05</b> | $\pm$   | <b>0.25</b> | 0.82 | <0.01 | -0.79        | $\pm$ | 0.47        | 0.43 | 0.08  |
|          | uLSW  | -0.16                                             | $\pm$ | 0.13        | 0.27                                              | 0.19  | -0.04        | $\pm$                                             | 0.16        | 0.02    | 0.76                                              | <b>1.14</b> | $\pm$   | <b>0.20</b> | 0.89 | <0.01 | -0.80        | $\pm$ | 0.48        | 0.42 | 0.08  |
|          | LSW   | <b>-0.11</b>                                      | $\pm$ | <b>0.18</b> | 0.09                                              | 0.47  | -0.02        | $\pm$                                             | 0.15        | 0.00    | 0.90                                              | <b>1.08</b> | $\pm$   | <b>0.24</b> | 0.85 | <0.01 | <b>-0.89</b> | $\pm$ | <b>0.41</b> | 0.55 | 0.04  |
|          | ISOW  | -0.05                                             | $\pm$ | 0.13        | 0.04                                              | 0.64  | -0.05        | $\pm$                                             | 0.12        | 0.05    | 0.61                                              | <b>0.90</b> | $\pm$   | <b>0.33</b> | 0.66 | <0.01 | <b>-0.49</b> | $\pm$ | <b>0.26</b> | 0.48 | 0.05  |
|          | DSOW  | <b>-0.18</b>                                      | $\pm$ | <b>0.09</b> | 0.53                                              | 0.04  | <b>-0.24</b> | $\pm$                                             | <b>0.07</b> | 0.75    | <0.01                                             | <b>1.28</b> | $\pm$   | <b>0.23</b> | 0.89 | <0.01 | -0.62        | $\pm$ | 0.40        | 0.38 | 0.10  |
| Iceland  | SPMW  | <b>-0.56</b>                                      | $\pm$ | <b>0.19</b> | 0.70                                              | <0.01 | <b>0.25</b>  | $\pm$                                             | <b>0.08</b> | 0.72    | <0.01                                             | <b>1.63</b> | $\pm$   | <b>0.70</b> | 0.59 | 0.03  | -0.28        | $\pm$ | 0.98        | 0.02 | 0.73  |
|          | uLSW  | -0.20                                             | $\pm$ | 0.19        | 0.22                                              | 0.24  | -0.10        | $\pm$                                             | 0.18        | 0.07    | 0.53                                              | <b>0.79</b> | $\pm$   | <b>0.25</b> | 0.72 | <0.01 | <b>-1.05</b> | $\pm$ | <b>0.28</b> | 0.79 | <0.01 |
|          | LSW   | 0.02                                              | $\pm$ | 0.20        | 0.00                                              | 0.88  | -0.02        | $\pm$                                             | 0.18        | 0.00    | 0.92                                              | <b>0.86</b> | $\pm$   | <b>0.22</b> | 0.80 | <0.01 | -0.52        | $\pm$ | 0.32        | 0.40 | 0.09  |
|          | ISOW  | 0.01                                              | $\pm$ | 0.16        | 0.00                                              | 0.96  | 0.05         | $\pm$                                             | 0.16        | 0.02    | 0.72                                              | <b>1.03</b> | $\pm$   | <b>0.16</b> | 0.91 | <0.01 | -0.45        | $\pm$ | 0.29        | 0.38 | 0.10  |
| Rockall  | ENACW | -0.71                                             | $\pm$ | 0.41        | 0.44                                              | 0.07  | 0.35         | $\pm$                                             | 0.32        | 0.24    | 0.21                                              | 1.02        | $\pm$   | 0.63        | 0.41 | 0.09  | <b>-2.03</b> | $\pm$ | <b>0.69</b> | 0.70 | <0.01 |
|          | SPMW  | -0.55                                             | $\pm$ | 0.22        | 0.62                                              | 0.02  | <b>0.20</b>  | $\pm$                                             | <b>0.09</b> | 0.54    | 0.04                                              | <b>1.56</b> | $\pm$   | <b>0.50</b> | 0.72 | <0.01 | -0.10        | $\pm$ | 0.66        | 0.01 | 0.85  |
|          | LSW   | <b>-0.05</b>                                      | $\pm$ | <b>0.13</b> | 0.05                                              | 0.61  | -0.06        | $\pm$                                             | 0.15        | 0.03    | 0.66                                              | 0.36        | $\pm$   | 0.33        | 0.24 | 0.22  | <b>-1.38</b> | $\pm$ | <b>0.37</b> | 0.78 | <0.01 |
